# Supplementary material for: Metabolomics biomarker analysis of threatened abortion in polycystic ovary syndrome: a clinical discovery study
Source: Royal Society of Chemistry journal article supplement (doi:10.1039/c6ra27357b), 2017-01-01
Supplement: c6ra27357b1.pdf [file c6ra27357b1.pdf]

**Table S1.** Clinical biochemical comparison of the three groups.

|                          | Control<br>(n=26) | Normal PCOS<br>(n=26)   |
|--------------------------|-------------------|-------------------------|
| age (years)              | 28.77±3.06        | 28.46±3.47              |
| Gestation (days)         | 46.38±4.66        | 47.46±3.33              |
| BMI (kg/m <sup>2</sup> ) | 21.63±2.04        | 21.98±1.05              |
| Waist-hip ratio          | 0.79±0.03         | 0.81±0.04               |
| E <sub>2</sub>           | 9.51±0.83         | 8.94±0.74 <sup>a</sup>  |
| P (ng/ml)                | 25.28±4.88        | 20.03±5.23 <sup>a</sup> |
| β-HCG                    | 4.78±0.52         | 4.10±0.46 <sup>a</sup>  |
| T(ng/ml)                 | 4.71±0.63         | 5.85±0.61 <sup>a</sup>  |
| DHEAS(pg/ml)             | 38.01±8.07        | 38.40±7.53              |
| AND(nmol/l)              | 14.88±1.97        | 21.26±2.50 <sup>a</sup> |
| SHBG(nmol/l)             | 26.96±3.18        | 21.87±3.21 <sup>a</sup> |
| LDL (ng/dl)              | 10.11±1.17        | 10.99±2.72              |
| HDL (pg/ml)              | 57.27±8.26        | 47.26±9.54 <sup>a</sup> |
| TG(nmol/l)               | 40.39±0.99        | 41.75±3.61              |
| TC(nmol/l)               | 15.51±1.71        | 20.14±1.61 <sup>a</sup> |
| FPG(mmol/l)              | 4.72±0.69         | 4.89±0.92               |
| FINS(Um/l)               | 10.30±1.48        | 11.16±1.40              |
| HOMA-IR                  | 2.17±0.51         | 2.42±0.51               |

<sup>a</sup> p < 0.05 control compared with PCOS.

the data of E<sub>2</sub> and β-HCG after a logarithmic transformation

**Table S2.** Potential biomarkers identified in positive and negative ESI mode.

| metabolite     | VIP   | Rt (min) | accurate mass | variance | ESI | model | class                    | pathway                       |
|----------------|-------|----------|---------------|----------|-----|-------|--------------------------|-------------------------------|
| LPC 16:0sn-1   | 13.4  | 9.56     | 496.34        | ↑        | +   |       | lysophosphatidylcholines | lipid metabolism              |
| LPC 16:0sn-2   | 4.42  | 9.31     | 496.34        | ↑        | +   |       | lysophosphatidylcholines | lipid metabolism              |
| LPC 18:0 sn-1  | 8.08  | 10.75    | 524.37        | ↑        | +   |       | lysophosphatidylcholines | lipid metabolism              |
| LPC 18:1 sn-1  | 4.28  | 9.98     | 522.36        | ↑        | +   |       | lysophosphatidylcholines | lipid metabolism              |
| FFA 18:1       | 11.10 | 14.57    | 281.25        | ↓        | -   |       | free fatty acid          | lipid metabolism              |
| CarnitineC2:0  | 5.94  | 0.75     | 204.12        | ↓        | +   |       | carnitine                | beta oxidation of fatty acids |
| CarnitineC10:0 | 3.13  | 6.17     | 316.25        | ↓        | +   |       | carnitine                | beta oxidation of fatty acids |

<sup>a</sup> show difference in the PCOS women compared with that in health women.
